# Supplementary material for: Nacre-inspired crystallization and elastic “brick-and-mortar” structure for a wearable perovskite solar module
Source: Royal Society of Chemistry journal article supplement (doi:10.1039/c8ee01799a), 2018-10-15
Supplement: c8ee01799a1.pdf [file c8ee01799a1.pdf]

1 **Nacre-inspired crystallization and elastic “brick-and-**  
2 **mortar” structure for a wearable perovskite solar module**

3 Xiaotian Hu<sup>a,b</sup>, Zengqi Huang<sup>c</sup>, Fengyu Li<sup>\*a</sup>, Meng Su<sup>a</sup>, Zhandong Huang<sup>a,b</sup>, Zhipeng  
4 Zhao<sup>a,b</sup>, Zheren Cai<sup>a,b</sup>, Xia Yang<sup>c</sup>, Xiangchuan Meng<sup>c</sup>, Pengwei Li<sup>a,b</sup>, Yang Wang<sup>a</sup>,  
5 Mingzhu Li<sup>a</sup>, Yiwang Chen<sup>3</sup>, Yanlin Song<sup>\*a</sup>

6

7

8 *<sup>a</sup>Key Laboratory of Green Printing, Institute of Chemistry, Chinese Academy of*  
9 *Sciences (ICCAS), Beijing Engineering Research Center of Nanomaterials for Green*  
10 *Printing Technology, Beijing National Laboratory for Molecular Sciences (BNLMS),*  
11 *Beijing, 100190, P. R. China.*

12 *<sup>b</sup>University of Chinese Academy of Sciences, Beijing, 100049, P. R. China.*

13 *<sup>c</sup>College of Chemistry/Institute of Polymers, Nanchang University, Nanchang 330031,*  
14 *P. R. China*

15 *\*E-mail: ylsong@iccas.ac.cn & forrest@iccas.ac.cn*

16

|    |                                                             |
|----|-------------------------------------------------------------|
| 17 | <b>Content</b>                                              |
| 18 | Fig. S1: Solubility of polymer matrix.                      |
| 19 | Fig. S2: Optimized concentrations of SEM images.            |
| 20 | Fig. S3: SEM images of SBS- and PU-based PVK films.         |
| 21 | Fig. S4: AFM height images.                                 |
| 22 | Fig. S5: Histogram of grain-size distributions.             |
| 23 | Fig. S6: 2D-XRD images.                                     |
| 24 | Fig. S7: Photographs of crystallization rate.               |
| 25 | Fig. S8: FTIR and XPS spectra.                              |
| 26 | Fig. S9: Simulated carriers' generation rate.               |
| 27 | Fig. S10: Steady-state fluorescence spectra.                |
| 28 | Fig. S11: SCLC analysis.                                    |
| 29 | Fig. S12: Current-sensing (CS) AFM images.                  |
| 30 | Fig. S13: Universality on glass substrate.                  |
| 31 | Fig. S14: Preparation process of wearable devices.          |
| 32 | Fig. S15: Semitransparent devices.                          |
| 33 | Tab. S1: Averaged photovoltaic parameters of wearable PSCs. |
| 34 | Fig. S16: IPCE spectra.                                     |
| 35 | Fig. S17, S18 and Tab. S2: Reproducibility.                 |
| 36 | Fig. S19: Certification report.                             |
| 37 | Tab. S3: Evaluation with other work.                        |
| 38 | Fig. S20: Bending stability.                                |
| 39 | Fig. S21, S22 and Tab. S4: Finite element simulation.       |
| 40 | Fig. S23: Statistics of mechanical stability.               |
| 41 | Fig. S24. Long-term stability.                              |
| 42 | Supplementary movies.                                       |
| 43 | References                                                  |

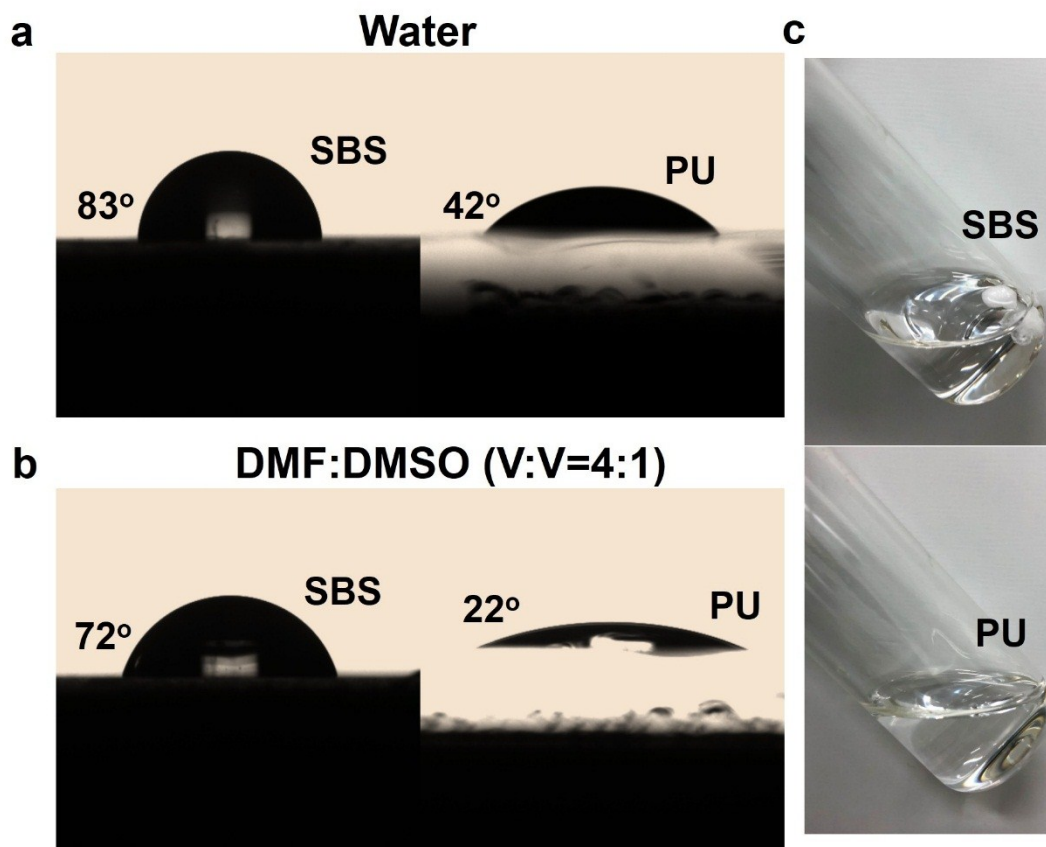

**Fig. S1.** The contact angle of (a) Water and (b) DMF:DMSO (V:V=4:1) on SBS and PU films, respectively. (c) Photographs of SBS and PU in DMF:DMSO (V:V=4:1) solvent.

The differences in contact angle and photographs of solubility can verify the insoluble property of SBS and soluble property of PU.

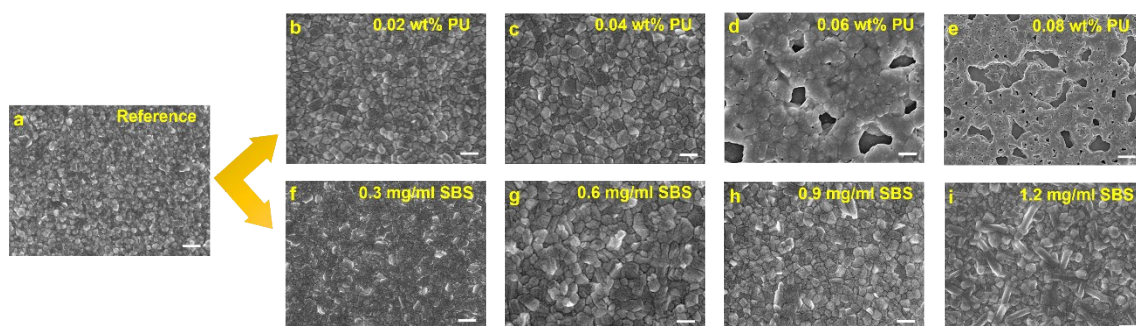

53

54

55 **Fig. S2.** SEM images of PVK films with different concentrations PU (wt% in  
56 precursor solution) or SBS (mg/ml in chlorobenzene anti-solvent) on  
57 PDMS/PEDOT:PSS electrode. All the scale bars, 500 nm.

58

59 As pervious reported<sup>1</sup>, PU can enhance the grain size of PVK due to the retardation of  
60 crystal growth. However, it shows obvious voids when the PU concentration over  
61 0.04 wt%, it could be ascribed to excessive interaction between PU with  $PbX_2$  ( $X = I$   
62 and Br). Meanwhile, SBS can also enhance the grain size of PVK because the  
63 hydrophobic and insoluble properties of SBS can reduce the number of nucleation  
64 sites during PVK crystal growth. On the other hand, for  $C_{SBS} > 0.6$  mg/ml, excessive  
65 SBS could aggregate on the surface. Based on the above results, the concentration of  
66 SBS and PU is defined as 0.04 wt% and 0.6 mg/ml in the following discussion.

67

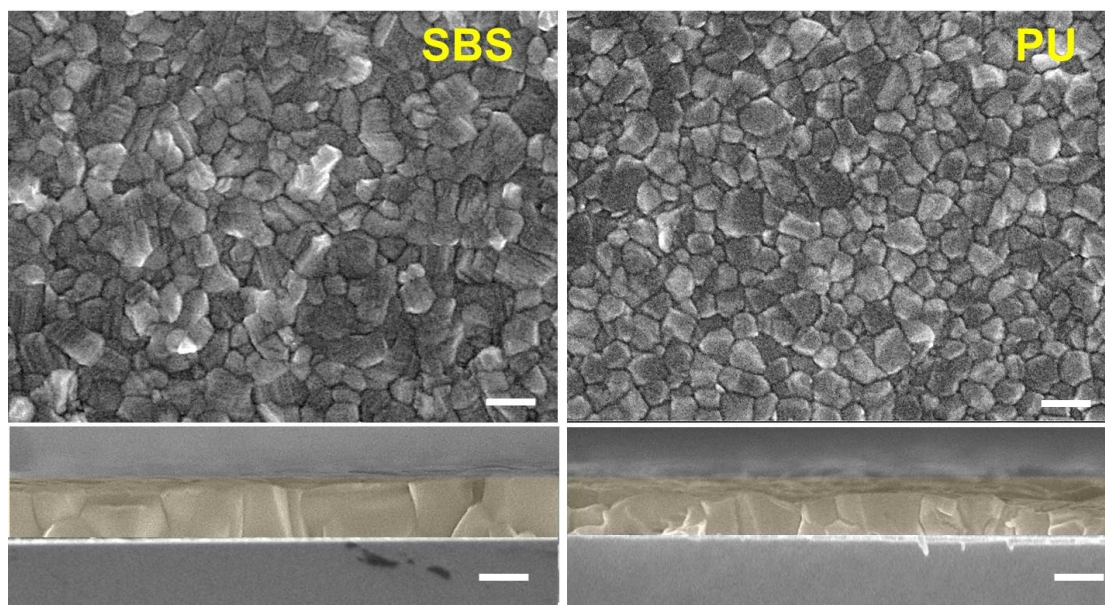

68

69

70 **Fig. S3.** The top-view and cross-section SEM images of SBS- and PU-based PVK  
 71 films.

72

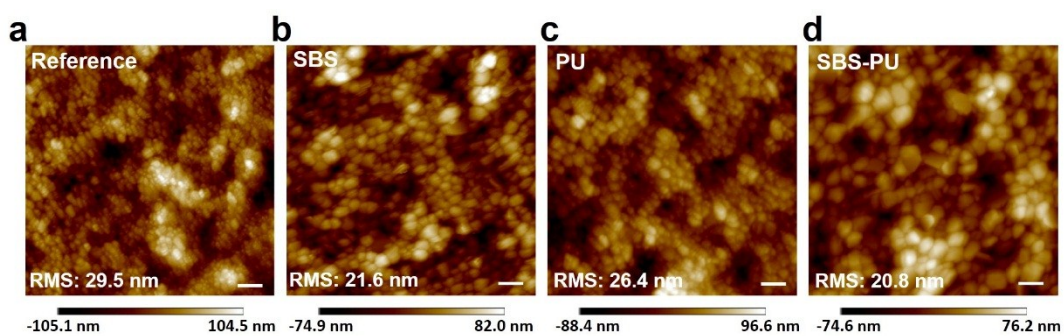

73  
 74 **Fig. S4.** AFM height images of (a) Reference, (b) SBS-based, (c) PU-based and (d)  
 75 SBS-PU-based PVK films on PDMS/PEDOT:PSS electrode. All the scale bars, 1  $\mu\text{m}$ .  
 76

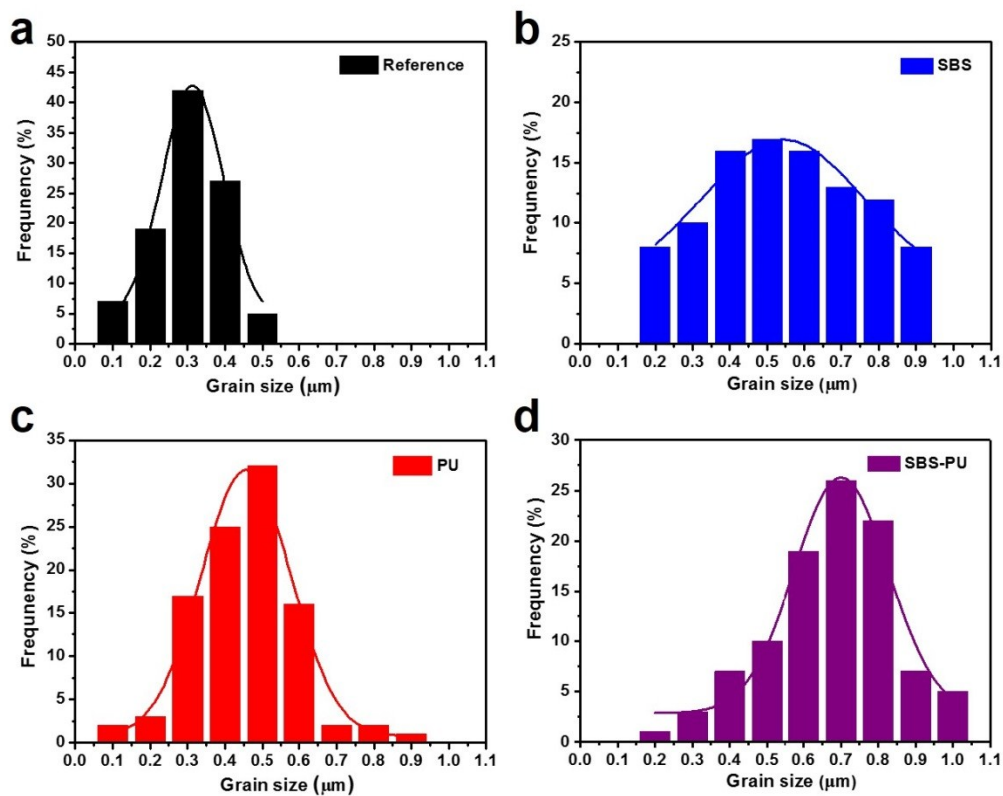

77

78 **Fig. S5.** Histogram of grain-size distributions. (a) Reference, (b) SBS-based, (c) PU-  
79 based and (d) SBS-PU-based PVK films on PDMS/PEDOT:PSS electrode.

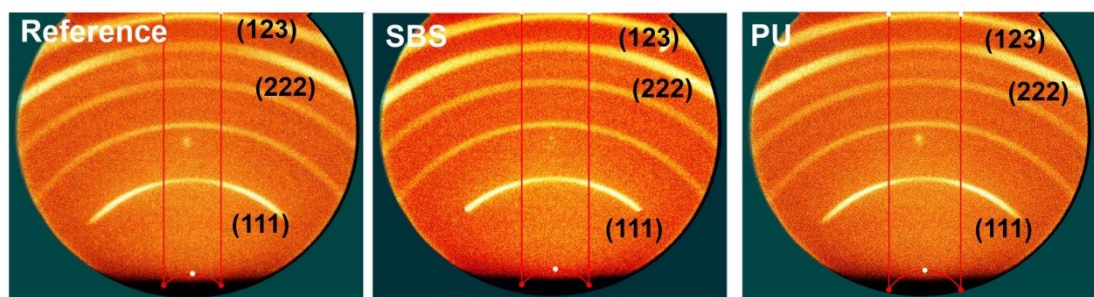

80

81 **Fig. S6.** 2D-XRD images of Reference, SBS- and PU- based PVK films.



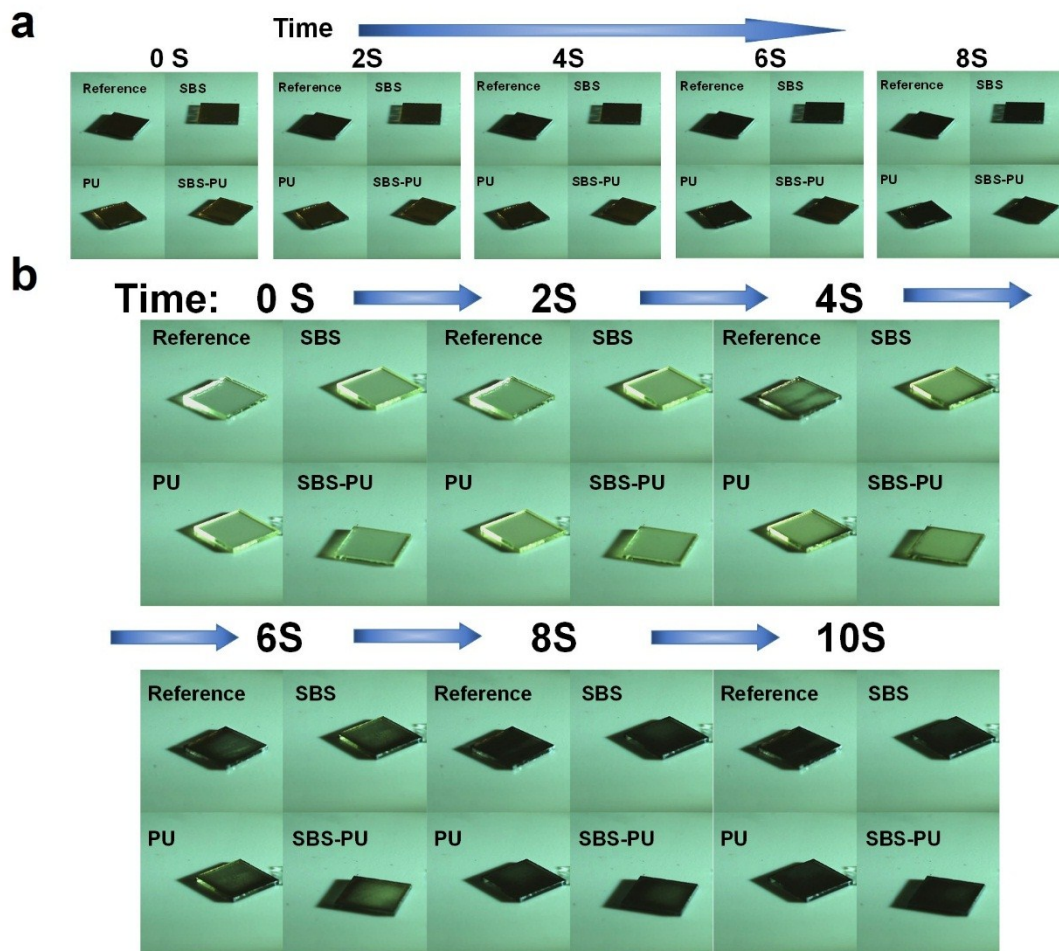

82

83 **Fig. S7.** Photographs of different PVK films on Glass/PDMS/PEDOT:PSS substrate  
 84 during initial crystallization at 100 °C via the high-speed camera. (a) standard  
 85 concentration of PVK precursor solution for PSCs fabrication. (b) 30% standard  
 86 concentration of PVK precursor solution to demonstrate the phenomenon clearly.

87

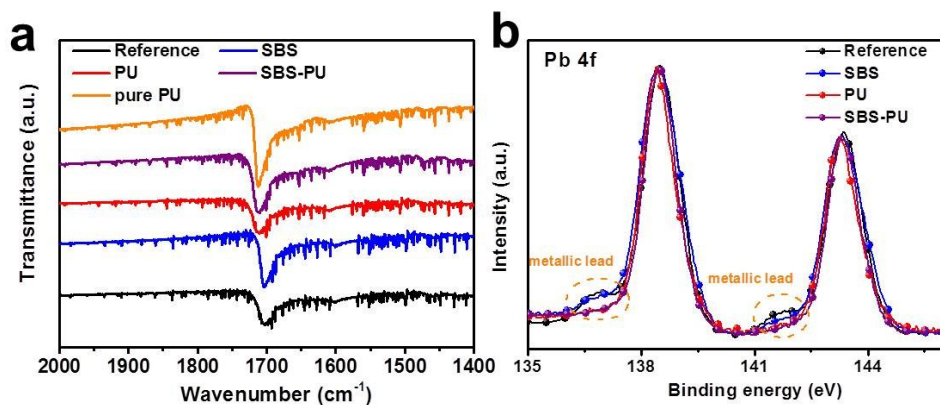

88  
 89 **Fig. S8.** (a), FTIR spectra of various PVK films on KBr substrate. The C=O  
 90 stretching vibration bond<sup>2</sup> is at 1710 cm<sup>-1</sup>. (b), X-ray photoelectron spectroscopy of  
 91 various PVK films on Glass/ITO substrate.  
 92

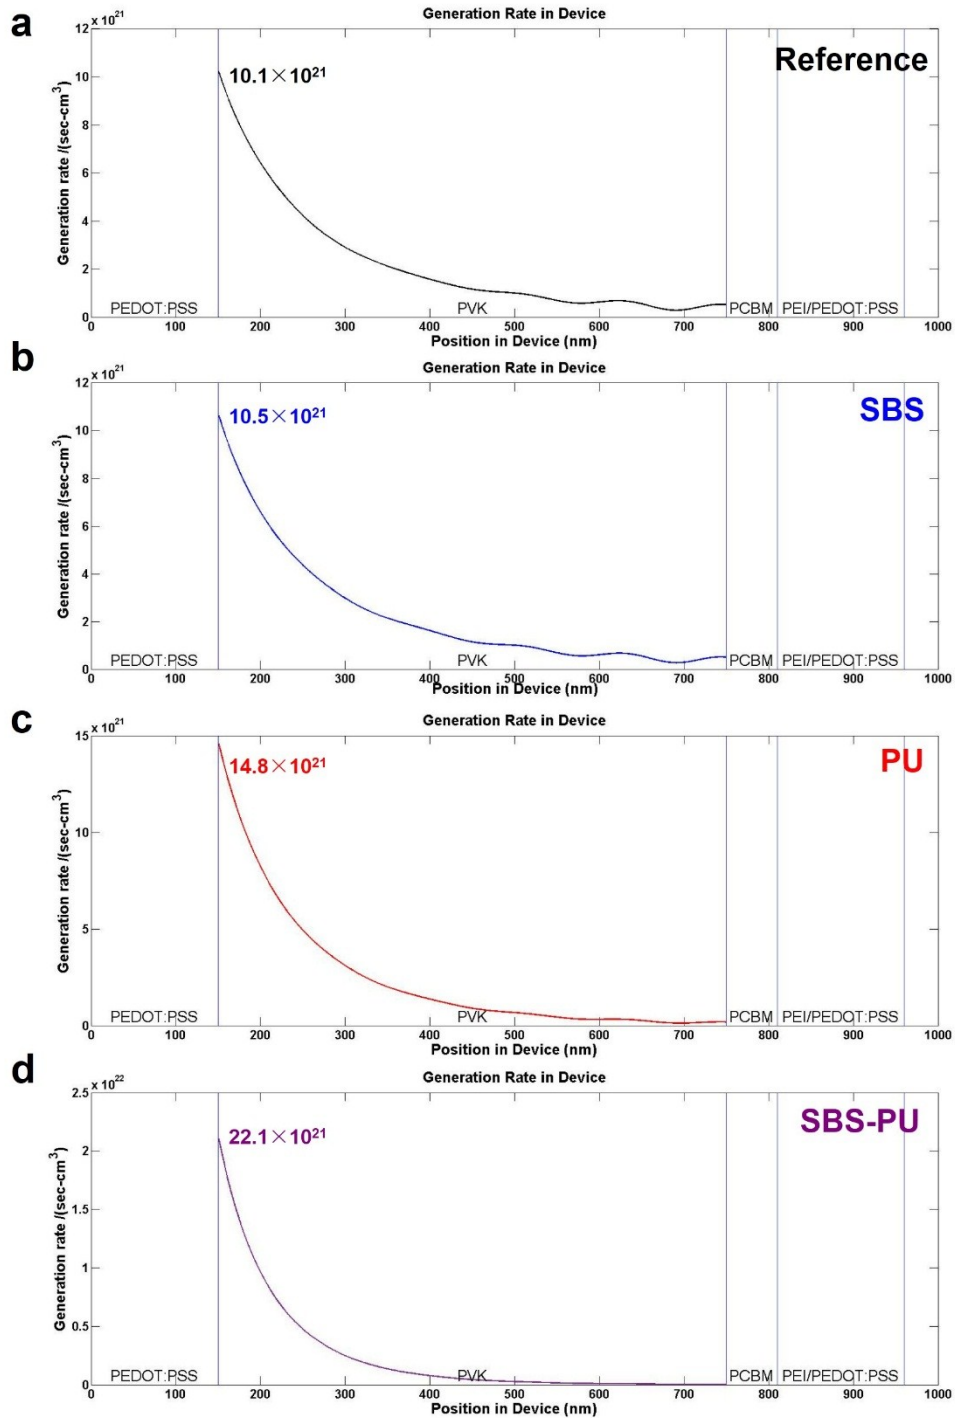

93  
 94 **Fig. S9.** The simulated carriers' generation rate is based on the optical electric field  
 95 structure via the transfer matrix method on *Matlab*<sup>3</sup>. The optical refractive index and  
 96 extinction coefficient of films were analyzed on silicon substrate by an ellipsometer.  
 97  
 98 It clearly shows that the polymer matrix can improve the carriers' generation rate. The  
 99 carriers' generation rate of SBS-PU-based devices is nearly twice that of reference  
 100 devices.  
 101

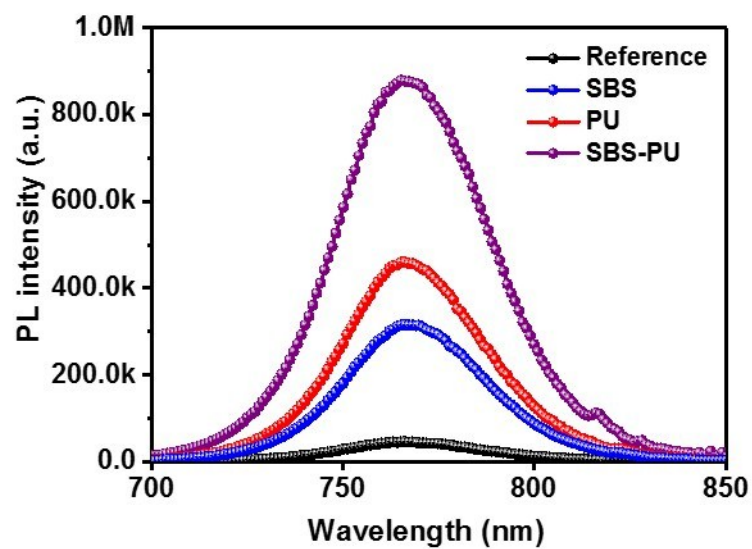

102

103 **Fig. S10.** Photoluminescence of PVK films on PDMS substrate with polymer matrix.

104 A more distinct fluorescence enhancing is observed for SBS-PU-based PVK film.

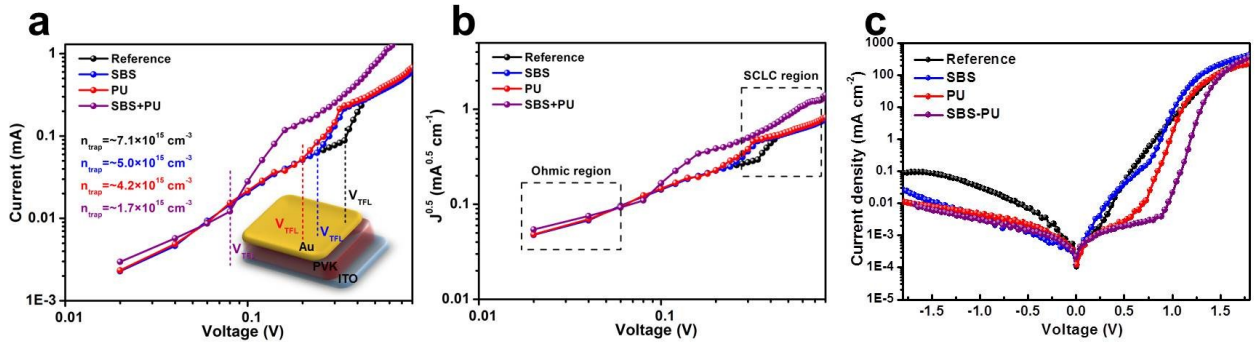

**Fig. S11.** Current-voltage curves of the PVK films with polymer matrix for space charge limited current (SCLC) analysis<sup>4,5</sup>. The inset depicts the SCLC architecture. (a) The trap density ( $n_{\text{trap}}$ ) of different PVK films. (b) The carrier mobility ( $\mu$ ) of different PVK films. (c) The dark  $J$ - $V$  curves of the device based on different PVK films (the device structure is PDMS/PEDOT:PSS/PVK/PEI/PEDOT:PSS/PDMS).

The trap density ( $n_{\text{trap}}$ ) of PVK films are determined from the SCLC model, using a device of PDMS/PEDOT:PSS/PVK/Au and measuring the current-voltage from 0 V to 1 V. The  $n_{\text{trap}}$  can be calculated by following equation:

$$n_{\text{trap}} = \frac{2V_{\text{tfl}}\epsilon\epsilon_0}{eL^2}$$

where  $e$  ( $1.6 \times 10^{-19}$ ) is the elementary charge,  $L$  ( $\sim 600$  nm) is the thickness of PVK films,  $\epsilon$  is the relative dielectric constant of PVK films ( $\sim 68$ , determined by the impedance spectroscopy),  $\epsilon_0$  is the vacuum dielectric constant and  $V_{\text{tfl}}$  is the trap-filled limited voltage. The  $V_{\text{tfl}}$  value of reference, SBS, PU and SBS-PU devices is 0.34 V, 0.24 V, 0.20 V and 0.08 V, respectively. So the calculated  $n_{\text{trap}}$  of reference, SBS, PU and SBS-PU devices is  $\sim 7.1 \times 10^{-15} \text{ cm}^{-3}$ ,  $\sim 5.0 \times 10^{-15} \text{ cm}^{-3}$ ,  $\sim 4.2 \times 10^{-15} \text{ cm}^{-3}$  and  $\sim 1.7 \times 10^{-15} \text{ cm}^{-3}$ , respectively.

In addition, the carrier mobility ( $\mu$ ) can be determined according to the Mott–Gurney law:

$$\mu = \frac{8JL^3}{9V^2\epsilon\epsilon_0}$$

where  $J$  is the current density, and the effective area is  $1.01 \text{ cm}^2$ . The calculated  $\mu$  of reference, SBS, PU and SBS-PU devices is  $2.2 \times 10^{-4} \text{ cm}^2 \text{ V}^{-1} \text{ S}^{-1}$ ,  $2.6 \times 10^{-4} \text{ cm}^2 \text{ V}^{-1} \text{ S}^{-1}$ ,  $3.0 \times 10^{-4} \text{ cm}^2 \text{ V}^{-1} \text{ S}^{-1}$  and  $1.1 \times 10^{-3} \text{ cm}^2 \text{ V}^{-1} \text{ S}^{-1}$ , respectively.

To further determine the quality of the PVK films, the dark current–voltage ( $J$ - $V$ )

135 characteristics for the devices based on different PVK films are presented in Fig. S11c.  
136 The much lower dark current density of the devices with SBS-PU matrix means  
137 enlarged shunt resistance, restrained leakage current, and higher rectification ratio,  
138 which also prove less defects and recombination centers with the biomimetic  
139 crystallization<sup>6</sup>.  
140



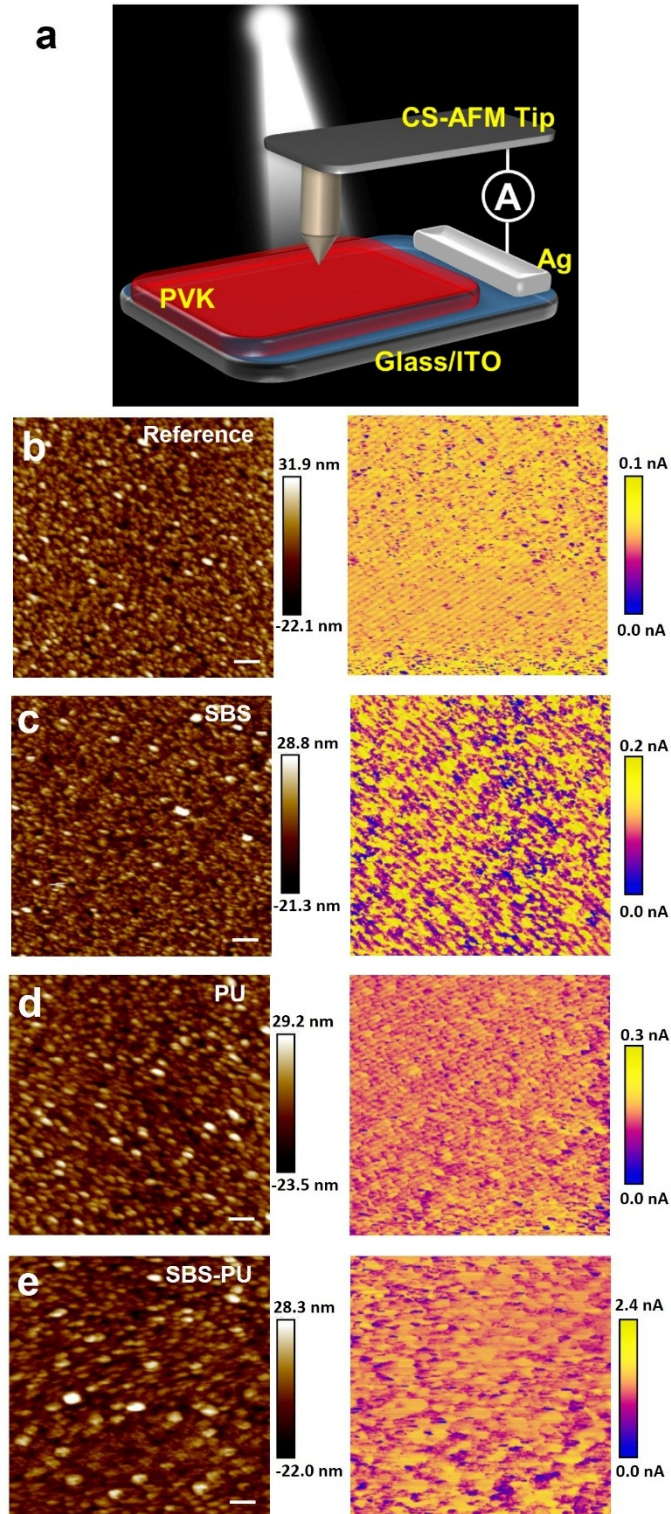

141

142 **Fig. S12.** Current-sensing (CS) AFM measurements. (a) Diagram of testing structure:  
 143 The PVK sample surface is illuminated while a conductive AFM tip measures the  
 144 photocurrent with an applied bias of 6 V. (b) Corresponding height AFM images (all  
 145 scale bar, 1  $\mu\text{m}$ ) and c, Current-sensing AFM images of various PVK films on  
 146 Glass/ITO substrate.

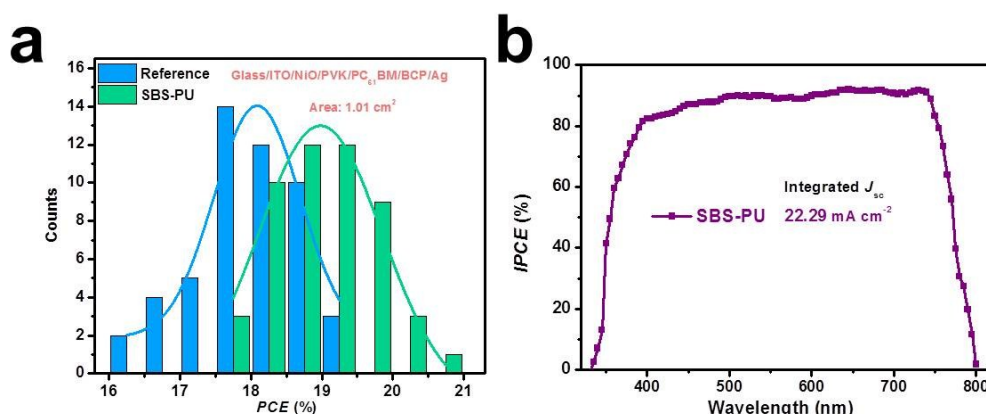

147

148 **Fig. S13. Universality of the biomimetic crystallization on rigid substrate.** (a)  
 149 Performance distribution of the reference and SBS-PU-based rigid devices for 50  
 150 samples in five batches. (b) The corresponding IPCE spectra of the rigid PSCs.

151

152 The rigid devices were prepared according to our previous report<sup>1,7</sup>. The structure of  
 153 devices is Glass/ITO/NiO/PVK/PC<sub>61</sub>BM/BCP/Ag. The NiO<sub>x</sub> ink was spin-coated on  
 154 pre-clean Glass/ITO electrode, then thermal annealing to obtain the HTL. The PVK  
 155 films were deposited as the same method with the wearable devices. The PC<sub>61</sub>BM  
 156 layer was modified by bathocuproine before vacuum evaporating the Ag electrode.  
 157 The effective area was 1.01 cm<sup>2</sup> defined by the certified mask. The measurement  
 158 conditions were in agreement with the wearable devices.

159



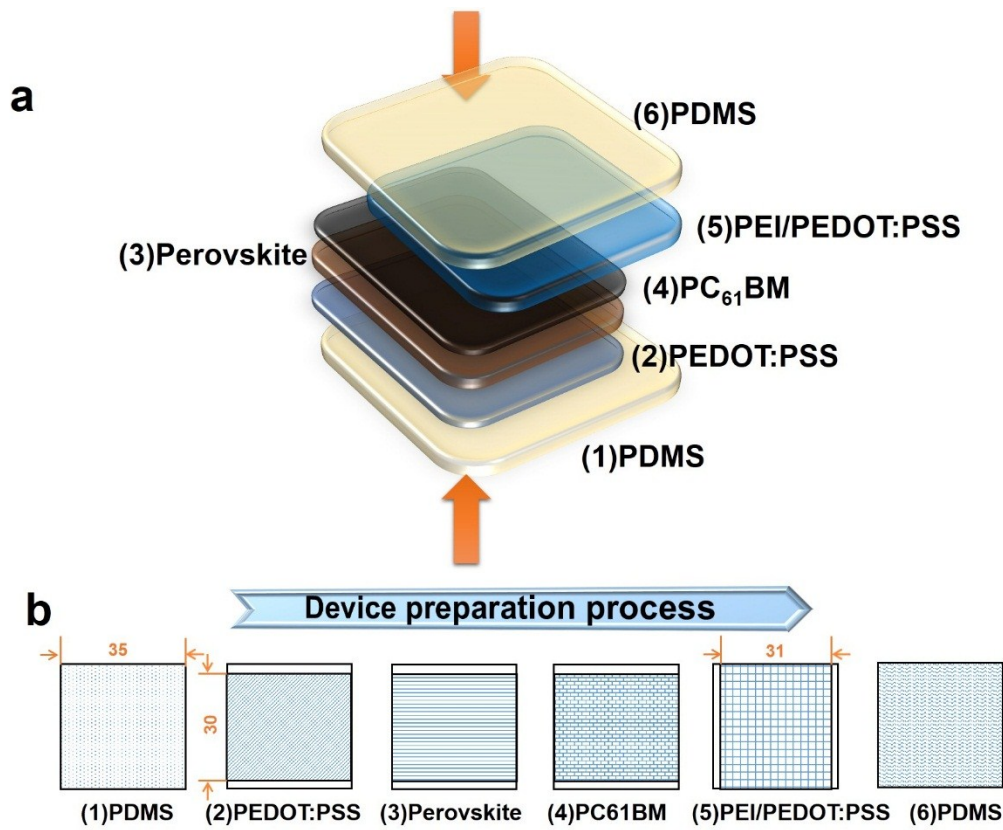

161  
 162 **Fig. S14.** (a) Configuration of the wearable PSCs and semi-transparent property. (b)  
 163 Device preparation process of the wearable PSCs from the bottom substrate to top  
 164 passivation layer, the unit of length is millimeter.  
 165

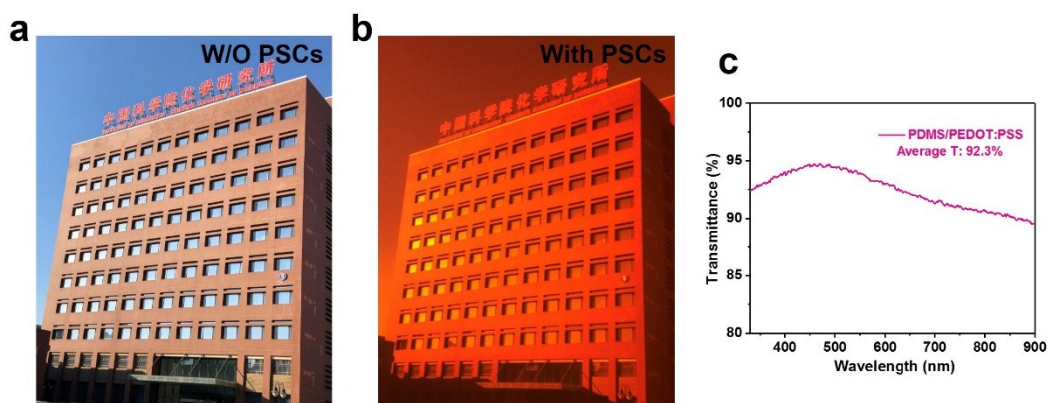

166

167

168 **Fig. S15.** Photographs are (a) not taken through and (b) taken through the SBS-PU-  
 169 based PSCs. The PSCs are attached to the camera. The two photographs verify a  
 170 certain amount of semi-transparency of the wearable PSCs (The photographs are  
 171 taken by Xiaotian Hu). (c) The transmittance of PDMS/PEDOT:PSS electrode  
 172 (Average T: 92.3%).

173 **Tab. S1.** Averaged photovoltaic parameters of wearable PSCs with different matrix.  
 174 Data in the parentheses indicate the maximum value. All the average values are  
 175 calculated by at least fifty samples.

| Device    | $J_{sc}$<br>(mA cm <sup>-2</sup> ) | $V_{oc}$<br>(V) | FF         | PCE<br>(%)   | Integrated $J_{sc}$<br>(mA cm <sup>-2</sup> ) |
|-----------|------------------------------------|-----------------|------------|--------------|-----------------------------------------------|
| Reference | 13.86 (14.55)                      | 1.01(1.04)      | 0.57(0.62) | 7.98(9.38)   | 14.51                                         |
| SBS       | 15.92(16.45)                       | 1.03(1.05)      | 0.65(0.70) | 10.36(12.09) | 16.04                                         |
| PU        | 16.32(16.74)                       | 1.03(1.05)      | 0.68(0.71) | 11.66(12.48) | 16.43                                         |
| SBS-PU    | 18.46(18.70)                       | 1.06(1.07)      | 0.76(0.78) | 15.01(15.61) | 18.07                                         |

176

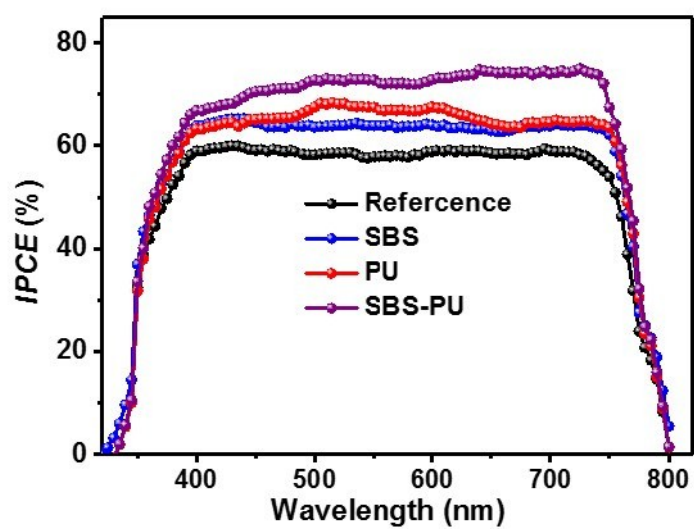

177

178 **Fig. S16.** The corresponding IPCE spectra of the wearable PSCs.

179

180 **Tab. S2.** Photovoltaic parameters of SBS-PU-based devices from ten batches of  
181 devices counting 100 cells in total (both the results of the backward and forward  
182 directions are included).

| Sample No. | $J_{sc}$<br>(mA cm <sup>-2</sup> ) | $V_{oc}$<br>(V) | FF   | PCE<br>(%) | Sample No. | $J_{sc}$<br>(mA cm <sup>-2</sup> ) | $V_{oc}$<br>(V) | FF   | PCE<br>(%) |
|------------|------------------------------------|-----------------|------|------------|------------|------------------------------------|-----------------|------|------------|
| 1          | 18.50                              | 1.07            | 0.77 | 15.24      | 51         | 18.35                              | 1.07            | 0.77 | 15.12      |
| 2          | 18.70                              | 1.06            | 0.78 | 15.46      | 52         | 18.43                              | 1.06            | 0.77 | 15.04      |
| 3          | 18.47                              | 1.06            | 0.77 | 15.07      | 53         | 18.70                              | 1.06            | 0.74 | 14.67      |
| 4          | 18.57                              | 1.05            | 0.72 | 14.04      | 54         | 18.46                              | 1.07            | 0.78 | 15.40      |
| 5          | 18.34                              | 1.05            | 0.76 | 14.64      | 55         | 18.66                              | 1.07            | 0.78 | 15.57      |
| 6          | 18.58                              | 1.06            | 0.78 | 15.36      | 56         | 18.70                              | 1.07            | 0.78 | 15.61      |
| 7          | 18.51                              | 1.06            | 0.78 | 15.30      | 57         | 18.37                              | 1.05            | 0.74 | 14.28      |
| 8          | 18.69                              | 1.06            | 0.77 | 15.25      | 58         | 18.59                              | 1.07            | 0.77 | 15.32      |
| 9          | 17.98                              | 1.07            | 0.78 | 15.01      | 59         | 18.58                              | 1.06            | 0.76 | 14.97      |
| 10         | 18.70                              | 1.06            | 0.77 | 15.26      | 60         | 18.27                              | 1.07            | 0.76 | 14.85      |
| 11         | 18.08                              | 1.07            | 0.74 | 14.31      | 61         | 18.58                              | 1.06            | 0.76 | 14.97      |
| 12         | 18.16                              | 1.07            | 0.77 | 14.96      | 62         | 18.64                              | 1.06            | 0.71 | 14.03      |
| 13         | 18.67                              | 1.07            | 0.77 | 15.38      | 63         | 18.62                              | 1.07            | 0.77 | 15.34      |
| 14         | 18.62                              | 1.07            | 0.77 | 15.34      | 64         | 18.63                              | 1.07            | 0.78 | 15.55      |
| 15         | 18.16                              | 1.04            | 0.77 | 14.54      | 65         | 18.16                              | 1.07            | 0.74 | 14.38      |
| 16         | 18.56                              | 1.05            | 0.76 | 14.81      | 66         | 18.27                              | 1.07            | 0.77 | 15.06      |
| 17         | 18.65                              | 1.07            | 0.76 | 15.17      | 67         | 18.61                              | 1.06            | 0.78 | 15.39      |
| 18         | 17.73                              | 1.07            | 0.78 | 14.79      | 68         | 18.70                              | 1.07            | 0.78 | 15.61      |
| 19         | 18.59                              | 1.04            | 0.77 | 14.89      | 69         | 18.44                              | 1.06            | 0.78 | 15.25      |
| 20         | 18.18                              | 1.07            | 0.76 | 14.78      | 70         | 18.70                              | 1.06            | 0.76 | 15.06      |
| 21         | 18.38                              | 1.07            | 0.72 | 14.16      | 71         | 18.66                              | 1.07            | 0.78 | 15.57      |
| 22         | 18.55                              | 1.07            | 0.77 | 15.28      | 72         | 18.19                              | 1.05            | 0.74 | 14.14      |
| 23         | 17.87                              | 1.06            | 0.73 | 13.83      | 73         | 18.35                              | 1.07            | 0.78 | 15.31      |
| 24         | 17.75                              | 1.07            | 0.75 | 14.24      | 74         | 18.63                              | 1.07            | 0.78 | 15.55      |
| 25         | 18.61                              | 1.07            | 0.78 | 15.53      | 75         | 18.64                              | 1.06            | 0.74 | 14.62      |
| 26         | 18.70                              | 1.07            | 0.78 | 15.61      | 76         | 18.61                              | 1.05            | 0.75 | 14.65      |
| 27         | 18.37                              | 1.05            | 0.73 | 14.08      | 77         | 18.59                              | 1.07            | 0.73 | 14.52      |
| 28         | 18.47                              | 1.07            | 0.78 | 15.41      | 78         | 18.31                              | 1.07            | 0.77 | 15.08      |
| 29         | 18.19                              | 1.07            | 0.78 | 15.18      | 79         | 18.66                              | 1.07            | 0.75 | 14.97      |
| 30         | 18.21                              | 1.06            | 0.75 | 14.48      | 80         | 18.26                              | 1.06            | 0.73 | 14.13      |
| 31         | 18.59                              | 1.07            | 0.73 | 14.52      | 81         | 18.36                              | 1.07            | 0.78 | 15.33      |
| 32         | 18.52                              | 1.07            | 0.78 | 15.46      | 82         | 18.59                              | 1.07            | 0.75 | 14.92      |
| 33         | 18.62                              | 1.06            | 0.73 | 14.41      | 83         | 18.63                              | 1.07            | 0.77 | 15.35      |
| 34         | 18.31                              | 1.07            | 0.75 | 14.70      | 84         | 18.66                              | 1.07            | 0.75 | 14.97      |
| 35         | 18.50                              | 1.07            | 0.76 | 15.04      | 85         | 18.61                              | 1.07            | 0.77 | 15.33      |
| 36         | 18.63                              | 1.07            | 0.76 | 15.15      | 86         | 18.05                              | 1.07            | 0.72 | 13.91      |
| 37         | 18.66                              | 1.06            | 0.77 | 15.23      | 87         | 18.70                              | 1.07            | 0.77 | 15.41      |
| 38         | 18.64                              | 1.06            | 0.76 | 15.02      | 88         | 18.61                              | 1.06            | 0.77 | 15.19      |

|           |       |      |      |       |            |       |      |      |       |
|-----------|-------|------|------|-------|------------|-------|------|------|-------|
| <b>39</b> | 18.62 | 1.07 | 0.78 | 15.54 | <b>89</b>  | 18.69 | 1.07 | 0.74 | 14.80 |
| <b>40</b> | 18.49 | 1.07 | 0.78 | 15.43 | <b>90</b>  | 18.59 | 1.06 | 0.77 | 15.17 |
| <b>41</b> | 18.68 | 1.07 | 0.78 | 15.59 | <b>91</b>  | 18.03 | 1.07 | 0.77 | 14.85 |
| <b>42</b> | 18.09 | 1.07 | 0.76 | 14.71 | <b>92</b>  | 18.61 | 1.07 | 0.73 | 14.54 |
| <b>43</b> | 18.70 | 1.06 | 0.76 | 15.06 | <b>93</b>  | 18.43 | 1.06 | 0.78 | 15.24 |
| <b>44</b> | 18.04 | 1.07 | 0.77 | 14.86 | <b>94</b>  | 18.66 | 1.06 | 0.77 | 15.23 |
| <b>45</b> | 18.33 | 1.07 | 0.77 | 15.10 | <b>95</b>  | 18.62 | 1.07 | 0.75 | 14.94 |
| <b>46</b> | 18.68 | 1.07 | 0.77 | 15.39 | <b>96</b>  | 18.62 | 1.06 | 0.77 | 15.20 |
| <b>47</b> | 17.92 | 1.05 | 0.72 | 13.55 | <b>97</b>  | 18.64 | 1.07 | 0.77 | 15.36 |
| <b>48</b> | 18.43 | 1.07 | 0.77 | 15.19 | <b>98</b>  | 18.62 | 1.07 | 0.78 | 15.54 |
| <b>49</b> | 18.57 | 1.06 | 0.76 | 14.96 | <b>99</b>  | 18.68 | 1.07 | 0.78 | 15.59 |
| <b>50</b> | 18.20 | 1.06 | 0.72 | 13.89 | <b>100</b> | 18.35 | 1.07 | 0.76 | 14.92 |

---

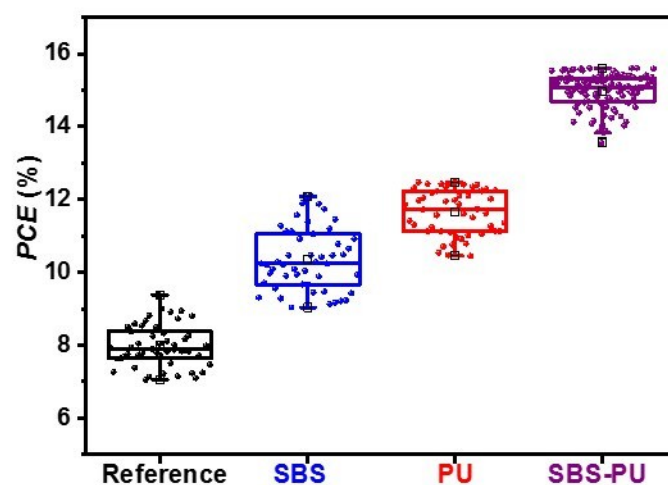

184  
 185 **Fig. S17.** Statistics of the device performance. In the boxplots, the open square  
 186 represents the maximum, minimum and mean values.  
 187

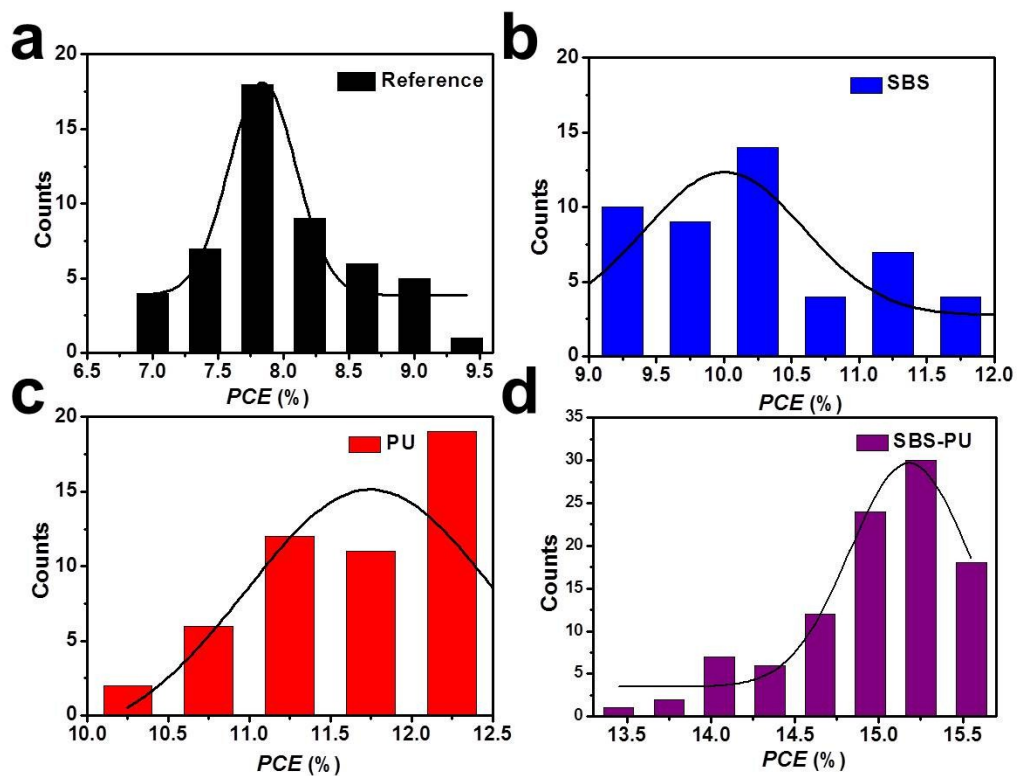

188

189 **Fig. S18.** Performance distribution of wearable devices with (a) Reference, (b) SBS,  
 190 (c) PU and (d) SBS-PU.

191



中国计量科学研究院 

### 测试报告

Test Report

证书编号: GXc2018-0067  
Certificate No.

|                      |                                                                          |
|----------------------|--------------------------------------------------------------------------|
| 客户名称<br>Client       | 中国科学院化学研究所<br>Institute of Chemistry, Chinese Academy of Sciences        |
| 器具名称<br>Instrument   | 可穿戴太阳能电池模组<br>Wearable Solar Cell Module (PVK)                           |
| 型号/规格<br>Type/Model  | /                                                                        |
| 出厂编号<br>Serial No.   | 1#                                                                       |
| 生产厂家<br>Manufacturer | 中国科学院化学研究所<br>Institute of Chemistry, Chinese Academy of Sciences        |
| 客户地址<br>Address      | 北京市海淀区中关村北一街2号<br>Zhongguancun North First Street 2, Beijing, P.R. China |
| 测试日期<br>Date of Test | 2018-01-10                                                               |

批准人:   
Approved by



地址: 中国 北京 北三环东路18号  
Address: No.18 Bei San Huan Dong Lu, Beijing, P.R. China  
邮编: 100029  
Post Code

电话: +86-10-64525607/4  
Tel: 传真: +86-10-64271948  
Fax 网址: http://www.nim.ac.cn  
Website 电子邮箱: kehufuwu@nim.ac.cn  
Email

第 1 页 共 4 页

中国计量科学研究院 

证书编号: GXc2018-0067  
Certificate No.

中国计量科学研究院是依法设立的计量科学研究中心和依法履行法定计量技术机构。1999年经批准成为国家计量委员会(CIPM)《国际计量标准》和国家计量院签发的校准与测量证书互认协议(CIPM MRA)。The National Institute of Metrology (NIM) is China's national metrology institute (NMI) and a state-level legal metrology institute. NIM is China's signatory to the Mutual Recognition of National Measurement Standards and of Calibration and Measurement Certificates issued by National Metrology Institutes (CIPM MRA) which is arranged by the International Committee of Weights and Measures (CIPM).

中国计量科学研究院的质量管理体系符合 ISO/IEC 17025 标准。通过中国合格评定国家认可委员会批准并获准开展(CIPM)互认的校准和测量能力(CMCs)在国际计量局(BIPM)关键比对数据库公布。NIM's quality management system meets requirements of the ISO/IEC 17025. Its Calibration and Measurement Capabilities (CMCs) that are peer reviewed both by China National Accreditation Service for Conformity Assessment (CNAS) and the Asia Pacific Metrology Programme (APMP) are published in the International Bureau of Weights and Measures (BIPM) Key Comparison Database (KCDB).

2011年,中国计量科学研究院和中国合格评定国家认可委员会就认可领域的技术评价活动签署了谅解备忘录。承认中国计量科学研究院的计量文件作用和出具的校准/检测结果的溯源效力。NIM and CNAS signed a Memorandum of Understanding (MOU) for Recognition of Technical Assessment in Laboratory Accreditation Field in 2011, in which CNAS recognizing the technical supporting role of NIM in laboratory accreditation and the traceability of NIM's calibration / test results.

测试结果不确定度的评估和表述均符合 JJF 1059 系列标准的要求。The evaluation and expression of uncertainty of the test results are in line with the requirements of JJF 1059 series standards.

测试所依据的技术文件(代号、名称) Reference documents (Code, Name)  
Measurement of photovoltaic current-voltage characteristics (IEC 60904-1)  
太阳能电池校准规范: 光电性能 (JJF 1622-2017) (Calibration Specification of Solar Cells: Photoelectric Properties)

测试环境条件及地点 Test place and environment  
温度 Temperature: 23.9 °C 地点 Location: 光学楼 110 室  
湿度 Humidity: 12.3 %RH 其它 Others:

测试使用的计量基(标准)装置(含标准物质)主要仪器  
Reference Standards (Including the Reference Material) / Instruments used

| 名称<br>Name                            | 测量范围<br>Measurement Range                                                  | 不确定度/准确度等级<br>Uncertainty/Accuracy                                      | 证书编号<br>Certificate No. | 证书有效期至<br>Due Date (YYYY-MM-DD) |
|---------------------------------------|----------------------------------------------------------------------------|-------------------------------------------------------------------------|-------------------------|---------------------------------|
| 太阳能电池光电性能校准装置<br>Measurement Standard | $I_{sc}$ : (0.1-10) A<br>$V_{oc}$ : (0.1-200) V<br>$P_{sc}$ : (0.01-500) W | $I_{sc}$ : 1.5% (k=2)<br>$V_{oc}$ : 0.5% (k=2)<br>$P_{sc}$ : 1.6% (k=2) | [2015]国家校准证书第 286 号     | 2019-07-05                      |
| 标准太阳能电池<br>Reference solar cell       | $I_{sc}$ : (0-200) mA                                                      | 1.2% (k=2)                                                              | GXc2017-0782            | 2018-03-16                      |

第 2 页 共 4 页

中国计量科学研究院 

证书编号: GXc2018-0067  
Certificate No.

### 测试结果

Calibration Results

1. 测试条件 Test Conditions:  
标准太阳能电池: 单晶硅 (81#);  
Reference Solar Cell: mono-Si (81#);  
标准太阳能电池的标称值: 125.68 mA;  
CV of Reference Solar Cell: 125.68 mA;  
太阳模拟器: 双光源太阳模拟器, AAA 级;  
Solar Simulator Classifications: double-light source in AAA classification;  
温度传感器/控制系统: 无;  
Temperature Sensor/Control System: None;  
Mask (Y/N): N;  
扫描方向: 正扫  
Scan Direction: forward

2. I-V 特性参数 I-V Characteristic parameters:  
以上标准太阳能电池标定太阳模拟器辐照度至 1000 W/m<sup>2</sup>, 校准被测太阳能电池的 I-V 特性曲线和参数如下:  
By using the above reference solar cell to calibrate the solar simulator's irradiance to 1000 W/m<sup>2</sup>, the I-V characteristic curve and parameters as follows:



第 3 页 共 4 页

中国计量科学研究院 

证书编号: GXc2018-0067  
Certificate No.

### 测试结果

Calibration Results

| 有效面积<br>(mm <sup>2</sup> ) | 短路电流<br>$I_{sc}$ (A) | 开路电压<br>$V_{oc}$ (V) | 最大功率<br>$P_{max}$ (W) |
|----------------------------|----------------------|----------------------|-----------------------|
| 5602.726                   | 0.33                 | 2.12                 | 0.44                  |

| 最大功率电流<br>$I_{max}$ (A) | 最大功率电压<br>$V_{max}$ (V) | 填充因子<br>FF (%) | 转换效率 (PCE)<br>$\eta$ (%) |
|-------------------------|-------------------------|----------------|--------------------------|
| 0.28                    | 1.60                    | 63.3           | 7.91                     |

注: Note:  
1. 测试所用 mask 的面积为 5602.726mm<sup>2</sup> (证书编号: CDJc2017-0195)。  
The mask area is 5602.726mm<sup>2</sup> (Certificate No.: CDJc2017-0195).  
2. 此数据仅对被测样品当时状态有效。  
The data apply only at the time of the test for the sample (not stabilized).  
(以下空白)

声明 Statement:  
1. 我单位对加盖“中国计量科学研究院校准专用章”的完整证书负责。  
NIM is ONLY responsible for the complete certificate with the calibration stamp of NIM.  
2. 本证书的测试结果仅对所校准的计量器具有效。  
The certificate is ONLY valid for the test of instrument.  
3. 本证书用中英文两种语言表述, 准确含义以中文为准。  
The certificate is reported in both English and Chinese, with the Chinese version as standard.

测试员:  核验员: 

第 4 页 共 4 页

192  
193 **Fig. S19.** Original reports of the wearable PVK module certificate results by the  
194 National Institute of Metrology (NIM) of China. The module area is measured at  
195 56.02 cm<sup>2</sup> with a PCE of 7.91%.

197 **Tab. S3.** Several representative performances of flexible PSCs for comparison to this  
198 work.

| Configuration                                          | Notes                                | Device chip<br>(PCE %; area cm <sup>2</sup> ) |             | Module<br>(PCE %; area cm <sup>2</sup> ) |              | Ref.                                     |
|--------------------------------------------------------|--------------------------------------|-----------------------------------------------|-------------|------------------------------------------|--------------|------------------------------------------|
| PET/ITO/PTAA                                           | Composition-Tailored PVK             | 14.0-16.0<br>(18.1 best)                      | 0.1         | -                                        | -            | Adv. Mater., 2017, 29, 1605900           |
| PET/ITO/ETL/...                                        | Pb(SCN) <sub>2</sub> additive        | 17.96 (best)                                  | 0.08        | -                                        | -            | Nano Energy, 2017, 35, 223–232.          |
| PEN/ITO/SnO <sub>2</sub> /...                          | SnO <sub>2</sub> QD                  | 16.97 (best)                                  | 0.09        | -                                        | -            | Adv. Mater., DOI: 10.1002/adma.201706023 |
| PET/ITO/ETL                                            | ionic liquid ETL                     | 16.0                                          | 0.08        | -                                        | -            | Adv. Mater., 2016, 28, 5206–5213.        |
| PEN/ITO/PTAA/...                                       | ZnO ETL                              | 15.6                                          | 0.16        | -                                        | -            | J. Mater. Chem. A, 2016, 4, 1572-1578.   |
| PEN/ITO/Zn <sub>2</sub> SnO <sub>4</sub> /...          | Zn <sub>2</sub> SnO <sub>4</sub> ETL | 15.3                                          | 0.10        | -                                        | -            | Nat. Commun., 2015, 6, 7410.             |
| PEN/Graphene-MoO <sub>3</sub> /...                     | Graphene electrode                   | 15.0                                          | 0.09        | -                                        | -            | Energy Environ. Sci., 2017, 10, 337      |
| PET/Ag mesh /PEDOT:PSS/...                             | Ultralight device                    | 14.0                                          | 0.1         | -                                        | -            | Nat. Commun., 2016, 7, 10214.            |
| PEN/ITO/Zn <sub>2</sub> SnO <sub>4</sub>               | Low temperature process              | 13.7                                          | 0.10        | -                                        | -            | Nat. Commun., 2015, 6, 7410.             |
| PET/ITO/NiO <sub>x</sub> /...                          | NiO <sub>x</sub> nanoparticles ink   | 13.4                                          | 0.07        | -                                        | -            | ACS Nano, 2016, 10, 3630–3636.           |
| PET/ITO/NiO <sub>x</sub> /...                          | nanostructured HTL                   | 13.3                                          | 0.06        | -                                        | -            | ACS Nano, 2016, 10, 1503–1511.           |
| PET/ITO /PEDOT:PSS/...                                 | layer by layer perovskite            | 12.3                                          | 0.12        | -                                        | -            | Adv. Mater., 2015, 27, 1053-1059.        |
| PEN/ITO/TiO <sub>x</sub>                               | ALD TiO <sub>x</sub>                 | 12.2                                          | -           | -                                        | -            | Energy Environ. Sci., 2015, 8, 916       |
| PI/ In <sub>2</sub> O <sub>3</sub> :H/ PTAA/PVK/...    | semi-transparent                     | 9%                                            | 0.29        | -                                        | -            | Nat. Energy, 2017, 2, 16190.             |
| PET/hc-PEDOT:PSS/...                                   | ultrathin substrate                  | 12.5                                          | 0.15        | ~8.4                                     | 8.64         | Nat. Mater., 2015, 14, 1032-1039.        |
| PEN/ITO/C <sub>60</sub> /...                           | PbI <sub>2</sub> vacuum deposition   | 11.6                                          | 1.20        | 7.8                                      | 16.00        | Sci. Rep. 2018, 8, 442.                  |
| <b>PDMS/PEDOT:PSS/<br/>PVK/PEI/<br/>PEDOT:PSS/PDMS</b> | <b>Wearable;<br/>Stretchable</b>     | <b>15.0</b>                                   | <b>1.01</b> | <b>7.9<br/>(certified)</b>               | <b>56.02</b> | <b>This work</b>                         |

199 \*The values of PCE are usually referred to the average PCE. “-” means not mentioned. HTL  
200 and ETL are hole transport layer and electron transport layer, respectively.  
201

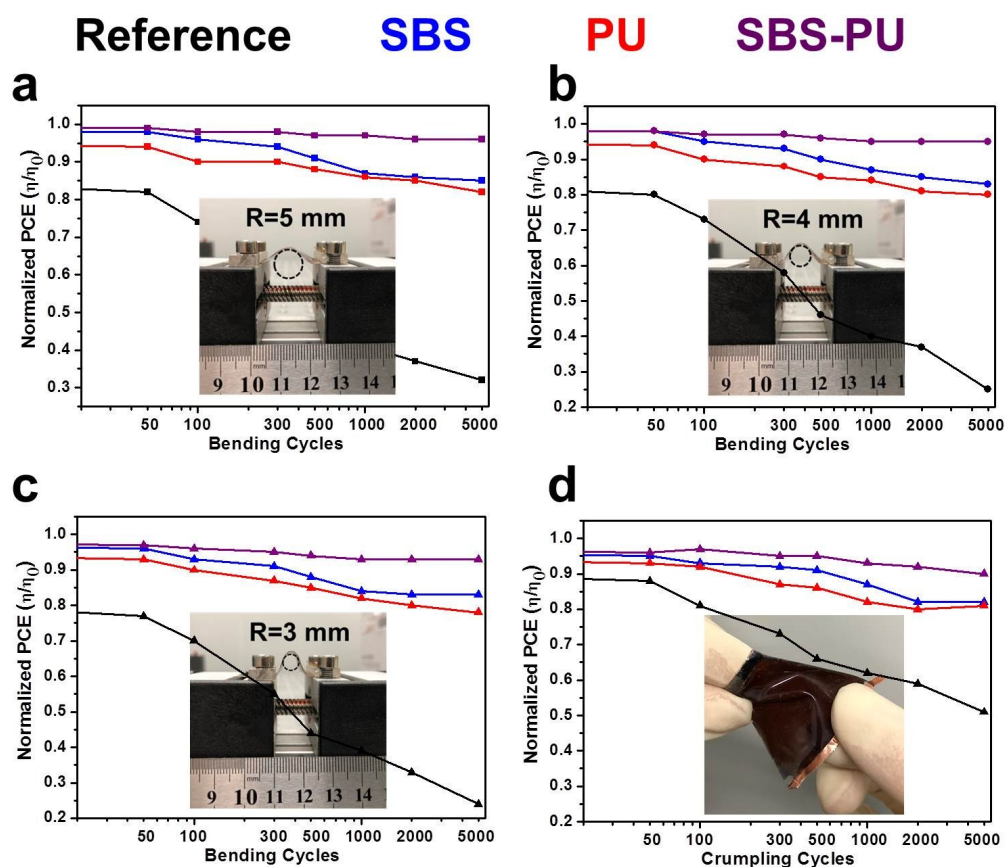

202

203 **Fig. S20.** Normalized average PCE of PSCs as a function of bending cycles with  
 204 radius of (a) 5 mm, (b) 4 mm and (c) 3 mm, respectively. (d) Normalized average  
 205 PCE of PSCs under crumpling test for 5000 cycles.

## 206 **Dynamical mechanics simulation**

207 To investigate the mechanical stability of different perovskite films, we used the  
 208 finite-element method to simulate the deformation of perovskite films under bending  
 209 and stretching. Due to the thickness of functional layers is much thinner than that of  
 210 PDMS. The PDMS layers are omitted under vertical bending and the stretching model  
 211 is defined as an elastomer under horizontal stretching.

212

213 Firstly, the basic theories for finite-element simulation were discussed.

214 **The bending test:** For the multilayer films, the relationship between film stress and  
 215 curvature radius is shown in: equation (1)

216

$$217 \quad \sigma_f = \frac{E_f h_f^2}{6(1 - \nu_s)R} \quad (1)$$

218

219  $\sigma_f$  is the value of stress,  $E_f$  is the Young's modulus of film,  $h_f$  is the thickness of film,  
 220  $\nu_s$  is the poisson's ratio of film and  $R$  is curvature radius.

221 The relationship of film stress and displacement: equation (2)

222

$$223 \quad D_{ij} = \sum_{k=1}^n \int_{z_k}^{z_k + h_k} Q_{ij}^{(k)} z^2 dz \quad (2)$$

224

225 Where  $D_{ij}$  is bending rigidity of system,  $k$  is the number of films and  $Q_{ij}$  is strain  
 226 under stress of  $k$  film. We can write the general control equation of film stress and  
 227 deformational displacement: as equation (3)

228

$$229 \quad D_{11} \frac{\partial^4 w}{\partial x^4} + 2(D_{12} + 2D_{23}) \frac{\partial^4 w}{\partial x^2 \partial y^2} + D_{22} \frac{\partial^4 w}{\partial y^4} - N_x \frac{\partial^2 w}{\partial x^2} - N_y \frac{\partial^2 w}{\partial y^2} - 2N_{xy} \frac{\partial^2 w}{\partial x \partial y}$$

$$230 \quad = \frac{\partial^2}{\partial x^2} (N_x) \frac{h}{2} + 2 \frac{\partial^2}{\partial x \partial y} (N_{xy}) \frac{h}{2} + \frac{\partial^2}{\partial y^2} (N_y) \frac{h}{2}$$

231 (3)

232 **The stretching test:** The tension of each layer and displacement: as equation (4)

$$233 \quad \frac{F}{S} = E_f \frac{\Delta l}{l_0} \quad (4)$$

234 Where  $F$  is tension,  $S$  is cross-sectional area of film,  $E_f$  is the Young's modulus of film,  
 235  $\Delta l$  is displacement and  $l_0$  is length of film.

236

237 The corresponding mechanical finite-element simulations: The Young's modulus of  
 238 different perovskite and PEDOT:PSS films is obtained from force-separation curves



by AFM, as shown in Fig. S21. The other mechanical properties were obtained from the Poisson's ratio tester (DP-4/2) or references<sup>8-10</sup>. All the mechanical properties of films are summarized in Tab. S4.

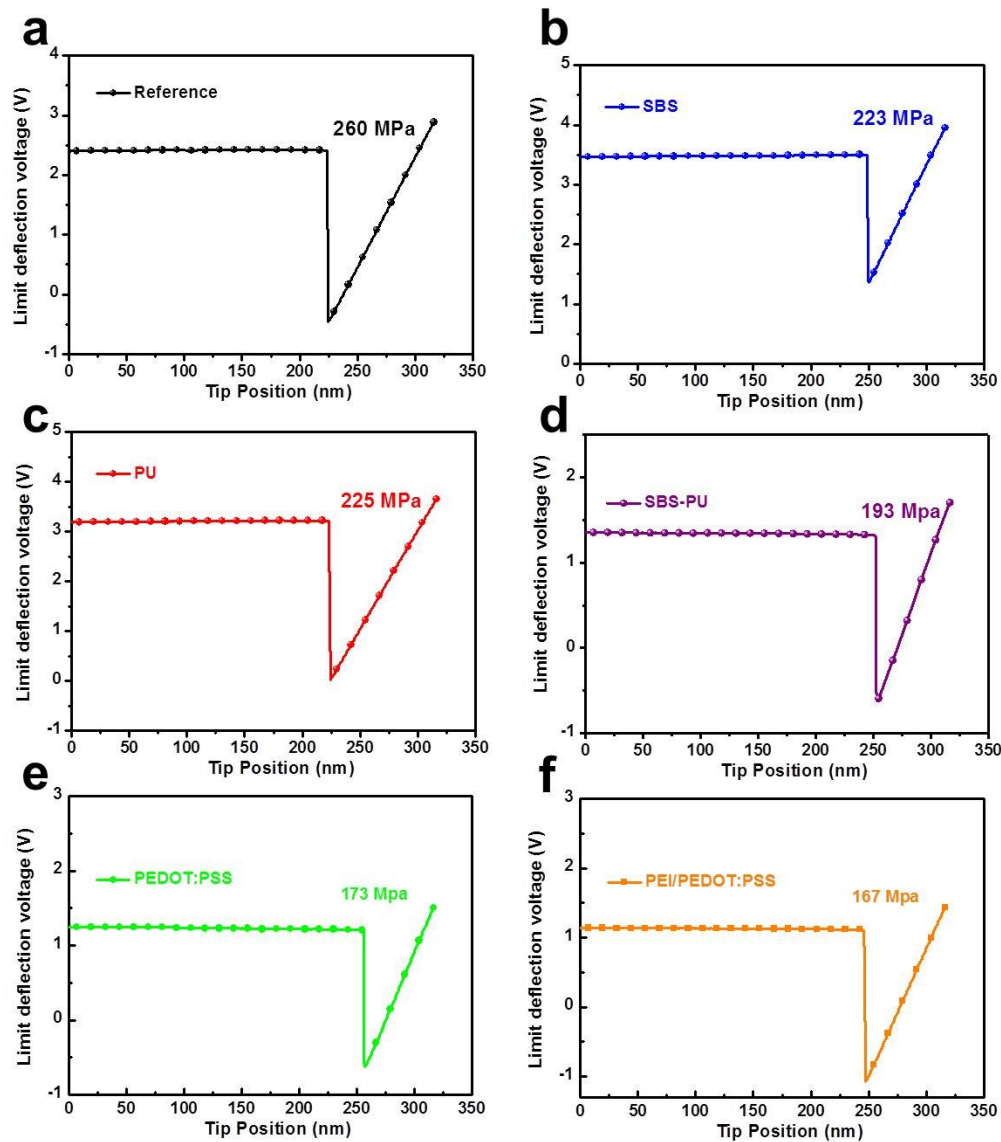

**Fig. S21.** Limit deflection curves of (a-d) different PVK films and (e,f) PEDOT:PSS films.

**Tab. S4.** Mechanical properties of each functional film for finite-element simulation.

| Materials           | Thickness<br>( $\mu\text{m}$ ) | Young's<br>modulus (Mpa) | Density<br>( $\rho$ , $\text{g cm}^{-3}$ ) | Poisson's ratio |
|---------------------|--------------------------------|--------------------------|--------------------------------------------|-----------------|
| PEDOT:PSS           | 0.15                           | 173                      | 1.39                                       | 0.32            |
| PVK                 | 0.60                           | 260;223;<br>225;193      | 4.1                                        | 0.31            |
| PC <sub>61</sub> BM | 0.06                           | 385                      | 1.6                                        | 0.36            |
| PEI/<br>PEDOT:PSS   | 0.13                           | 167                      | 1.37                                       | 0.32            |

247

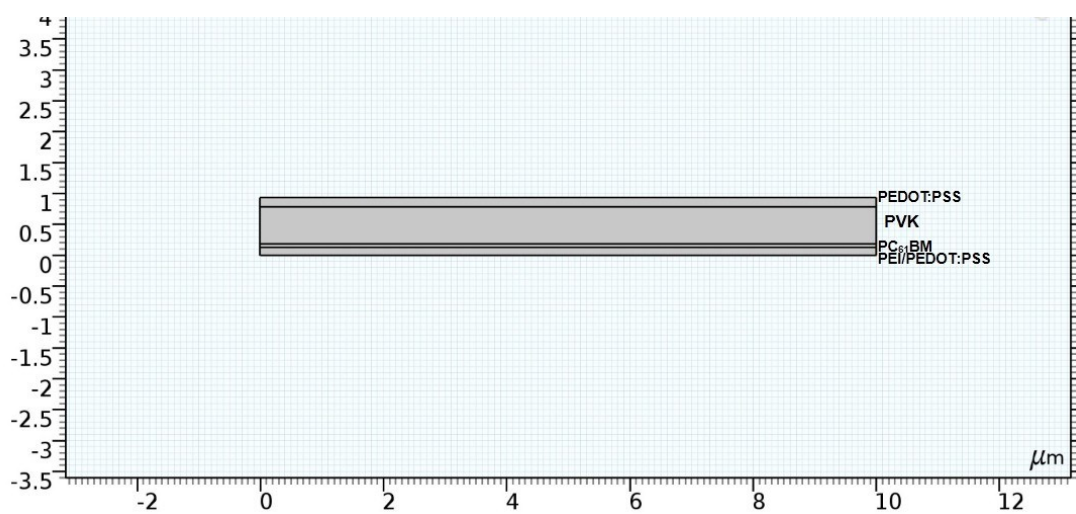

248

249 **Fig. S22.** The geometric model of PSCs for bending and stretching simulation. The  
 250 design of this two dimensional model is proportional, and the size of geometric unit is  
 251 0.5  $\mu\text{m}$  which can match with the grain size of PVK films.  
 252

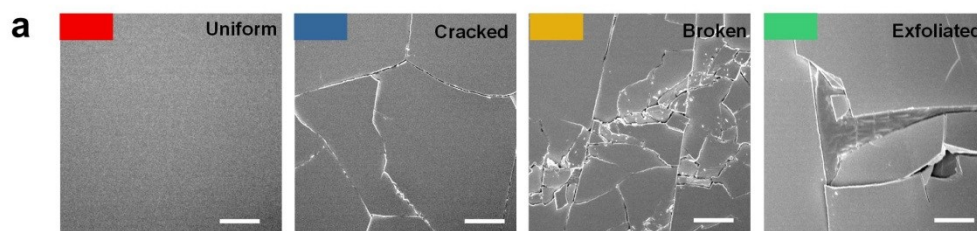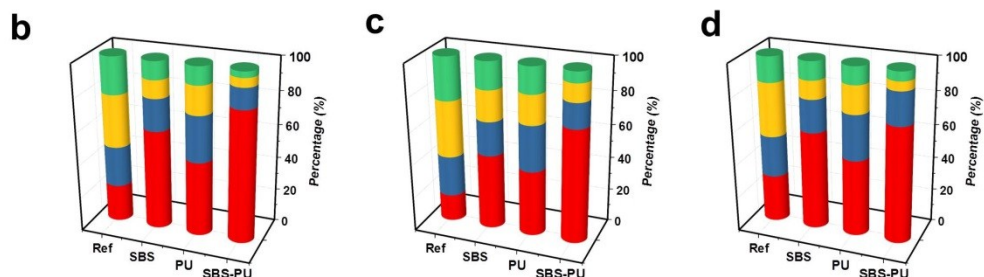

253 **5000 cycles bending test (2 mm)    5000 cycles stretching test (20%)    5000 cycles crumpling test**

254 **Fig. S23. Statistics of the mechanical stability.** (a) Four distinct mechanical  
 255 morphology of SEM results by bending or stretching test on wearable PSCs. Red is  
 256 uniform, blue is cracked, yellow is broken and green is exfoliated ones. (b) Stacked  
 257 column of the corresponding frequency of the PSCs after 5000 cycles bending test. (c)  
 258 Stacked column of the corresponding frequency of the PSCs after 5000 cycles  
 259 stretching test. (d) Stacked column of the corresponding frequency of the PSCs after  
 260 5000 cycles crumpling test. Both of the statistics are over 100 views.

261

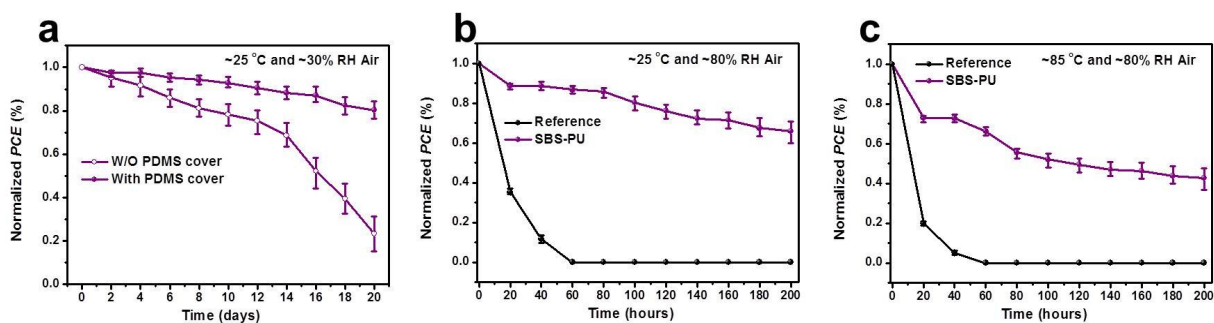

262

263 **Fig. S24. Long-term stability.** (a) The PSCs W/O or with PDMS cover under ~25 °C  
 264 and ~30% relative humidity (RH) conditions in the air. The device W/O PDMS cover  
 265 is peeling off the PDMS after film-transfer lamination. (b) The PSCs with PDMS  
 266 cover under the humid long-term stability test (~25 °C and ~80% RH). (c) The PSCs  
 267 with PDMS cover under the thermal long-term stability test (~85 °C and ~80% RH).  
 268 All the PSCs are stored in dark condition.

269

270 The top PDMS serves as a passivation for the device encapsulation, leading to an  
 271 enhanced long-term stability as shown in Fig. S24a. Moreover, the PSCs with SBS-  
 272 PU matrix can improve the humid and thermal long-term stability, which could be  
 273 attributed to the surface SBS layer on the PVK film and high quality of PVK film  
 274 with this biomimetic crystallization. The results show evident improvement of long-  
 275 term stability with different humid and thermal conditions.

276



277 **Movie S1.** The video shows the wearable PSCs power source can charge a  
278 smartwatch in a variety of body movements (~20 klx solar irradiance).

279

280 **Movie S2.** The video shows different PVK films on Glass/PDMS/PEDOT:PSS  
281 substrate during initial crystallization at 100 °C via the high-speed camera.

282

## 283 References

- 284 1. Z. Huang, X. Hu, C. Liu, L. Tan and Y. Chen, *Adv. Funct. Mater.*, 2017, **27**,  
285 1703061.
- 286 2. D. Bi, C. Yi, J. Luo, J. D. Décoppet, F. Zhang, S. M. Zakeeruddin, X. Li, A.  
287 Hagfeldt and M. Grätzel, *Nat. Energy*, 2016, **1**, 16142.
- 288 3. G. F. Burkhard, E. T. Hoke and M. D. McGehee, *Adv. Mater.*, 2010, **22**, 3293–  
289 3297.
- 290 4. Q. Han, S.-H. Bae, P. Sun, Y.-T. Hsieh, Y. M. Yang, Y. S. Rim, H. Zhao, Q.  
291 Chen, W. Shi, G. Li and Y. Yang, *Adv. Mater.*, 2016, **28**, 2253–2258.
- 292 5. M. He, B. Li, X. Cui, B. Jiang, Y. He, Y. Chen, D. O’Neil, P. Szymanski, M. A.  
293 Ei-Sayed, J. Huang and Z. Lin, *Nat. Commun.*, 2017, **8**, 16045.
- 294 6. H. Zhang, H. Wang, W. Chen and A. K. Y. Jen, *Adv. Mater.*, 2017, **29**,  
295 201604984.
- 296 7. X. Hu, Z. Huang, X. Zhou, P. Li, Y. Wang, Z. Huang, M. Su, W. Ren, F. Li, M.  
297 Li, Y. Chen and Y. Song, *Adv. Mater.*, 2017, **29**, 1703236
- 298 8. Y. Rakita, S. R. Cohen, N. K. Kedem, G. Hodes and D. Cahen, *MRS Commun.*,  
299 2015, **5**, 623–629.
- 300 9. M. Spina, A. Karimi, W. Andreoni, C. A. Pignedoli, B. Náfrádi, L. Forró and E.  
301 Horváth, *Appl. Phys. Lett.*, 2017, **12**, 121903.
- 302 10. D. Tank, H. H. Lee and D. Y. Khang, *Macromolecules*, 2009, **42**, 7079–7083.
